# Supplementary material for: Equilibrium and nonequilibrium dynamics of soft sphere fluids
Source: Royal Society of Chemistry journal article supplement (doi:10.1039/c5sm00637f), 2015-01-01
Supplement: c5sm00637f1.pdf [file c5sm00637f1.pdf]

**Supporting Material (ESI) for**

**“Equilibrium and nonequilibrium dynamics of soft sphere fluids”**

Yajun Ding and Jeetain Mittal<sup>1</sup>

*Department of Chemical and Biomolecular Engineering, Lehigh University,  
Bethlehem, PA 18015<sup>a)</sup>*

---

<sup>a)</sup>Electronic mail: jeetain@lehigh.edu

TABLE I. The state points (density  $\rho$  and temperatures  $T$ ) employed in simulations for different particle softness,  $n$ , and values of the coupling parameter at the freezing point,  $\Gamma_f$ , from Refs. 15 and 16 in the main text.

| $n$ | Density range | Temperature | $\Gamma_f$ |
|-----|---------------|-------------|------------|
| 36  | 0.01-1.00     | 1.0         | 0.942      |
| 24  | 0.01-1.00     | 1.0         | 0.970      |
| 12  | 0.01-1.20     | 1.0         | 1.167      |
| 10  | 0.01-1.40     | 1.0         | 1.300      |
| 8   | 0.01-1.70     | 1.0         | 1.579      |
| 6   | 0.01-2.50     | 1.0         | 2.331      |
| 4   | 0.01-5.80     | 1.0         | 5.685      |

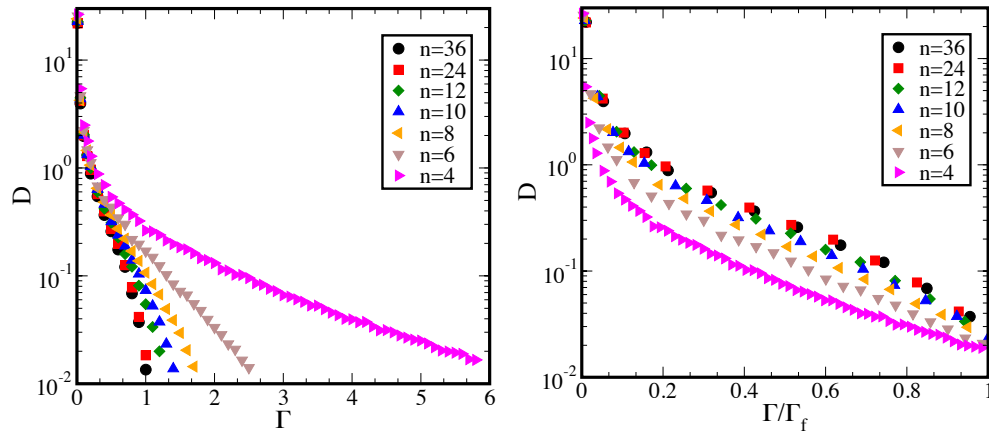

Figure S 1. Diffusion coefficient  $D$  versus the coupling parameter  $\Gamma$  (left panel) and the reduced coupling parameter  $\Gamma/\Gamma_f$  (right panel) for different particle softness,  $n$ , as indicated in the legend.

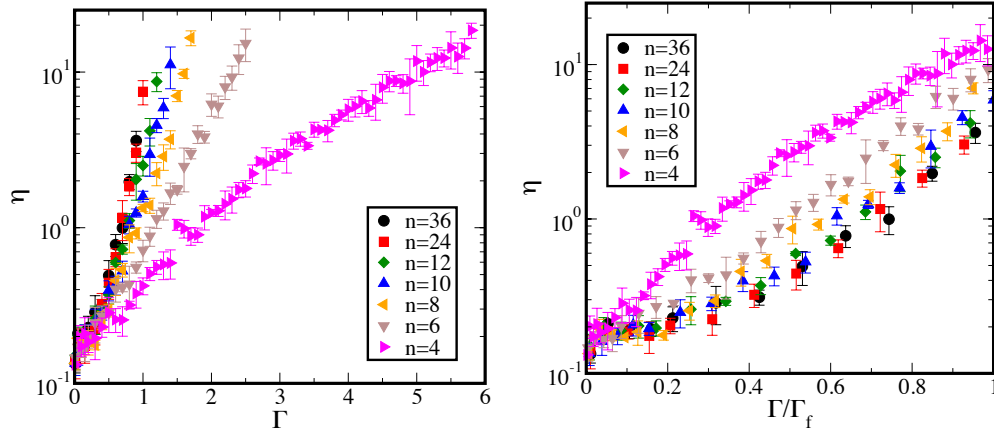

Figure S 2. Viscosity  $\eta$  versus the coupling parameter  $\Gamma$  (left panel) and the reduced coupling parameter  $\Gamma/\Gamma_f$  (right panel) for different particle softness,  $n$ , as indicated in the legend

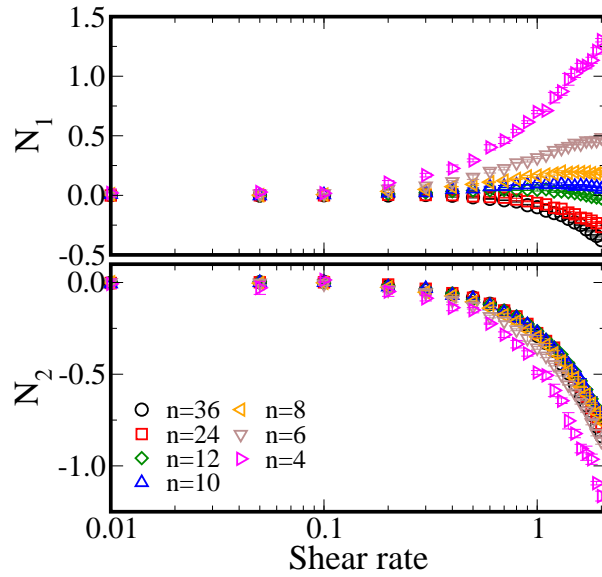

Figure S 3. First normal stress difference,  $N_1$ , and second normal stress difference,  $N_2$  as function of shear rate for different particle softness,  $n$ , as indicated in the legend
